# Supplementary material for: PRELIMINARY ORBIT MEASUREMENT FOR BEAM-BASED ALIGNMENT
Source: Oxford University Press journal article supplement (doi:10.1242/jeb.220707), 1996-01-01
Supplement: jeb220707supp.pdf [file jeb220707supp.pdf]

Table S1- List of differentially expressed genes between conspecific-exposed and heterospecific-exposed female *X. birchmanni*.

[Click here to Download Table S1](#)

Table S2 - Biological process gene ontology results for conspecific-exposed versus heterospecific-exposed female *X. birchmanni*. Gene List column refers to the list of genes to which a given row applies (DE = list of differentially expressed genes between B-EXP and M-EXP, UP = list of genes significantly upregulated in B-EXP, DOWN = list of genes significantly downregulated in B-EXP, SDMN = list of genes assigned to SDMN/stress module, vision = list of genes assigned to vision module, olfaction = list of genes assigned to olfaction module)

[Click here to Download Table S2](#)

Table S3- List of overlapping genes found to be differentially expressed in both the current study and in *X. malinche* exposed to conspecific vs. heterospecific adults.

[Click here to Download Table S3](#)

Table S4 - List of genes related to social decision-making, stress-coping, mate choice and olfaction, including log 2 fold changes between B-EXP and M-EXP female *X. birchmanni*. Highlighted colors over gene names/Ensembl ID's represent the color module assigned to a given gene (see keys at bottom of table). Tables are further subdivided according to functional roles. Genes significantly differentially expressed between B-EXP and M-EXP females according to DESeq2 after adjustment for multiple comparisons ( $p \text{ adj} < 0.1$ ) are italicized.

[Click here to Download Table S4](#)

Table S5 - Full list of genes assigned to the SDMN/stress, vision, and olfaction modules comparing conspecific-exposed and heterospecific-exposed female *X. birchmani* gene expression profiles.

[Click here to Download Table S5](#)

Table S6 - NetworkAnalyzer summary results describing connectivity measures among: 1) the 500 most central genes across the three modules differentially regulated between B-EXP and M-EXP females (salmon rows), and 2) all genes showing a direct connection with an odorant receptor gene (based on 0.02 weighted cutoff in Cytoscape) across the three modules (light blue rows). Column "SDMN?" refers to genes within the SDMN/stress-coping gene list in Table S5

[Click here to Download Table S6](#)
